# Supplementary material for: Conversion of Argan Nutshells into Novel Porous Carbons in the Scope of Circular Economy: Adsorption Performance of Emerging Contaminants
Source: MDPI journal article supplement (doi:10.3390/app12157607), 2022-07-28
Supplement: s1 [file s1]

## **Supplementary material**

Conversion of argan nutshells into novel porous carbons in the scope of circular economy: adsorption performance of emerging contaminants

A. Mokhati\*, O. Benturki, A. Benturki, R. Fennouh, Z. Kecira, M. Bernardo\*, I. Matos,  
N. Lapa, M. Ventura, O.S.G.P. Soares, A.M. Botelho do Rego, I.M. Fonseca

\*Corresponding authors:

A. Mokhati (Tel.: +213 699886459; email: amokhati@usthb.dz)

M. Bernardo (Tel.: +351 212948300; email: maria.b@fct.unl.pt)

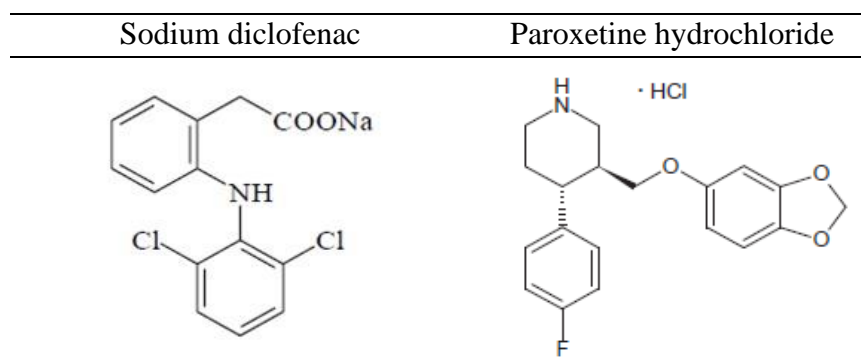

Figure S1. Molecular structures of the pharmaceutical compounds used in the present study.

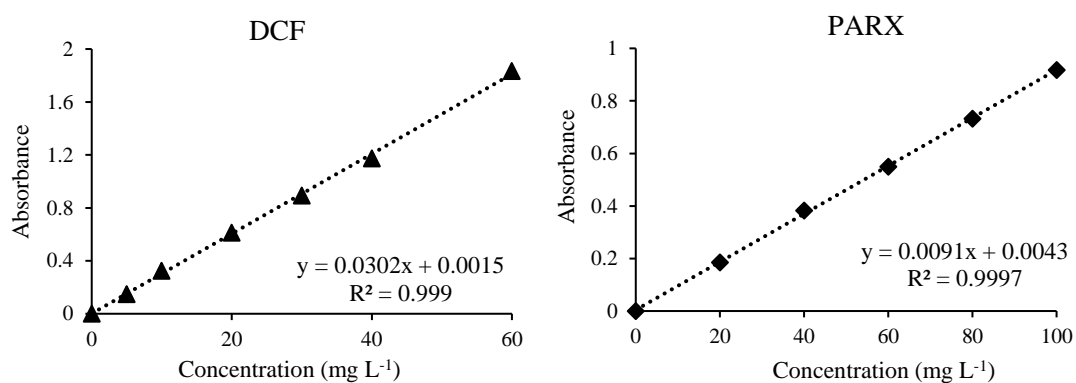

Figure S2. Calibration curves of DCF and PARX determined by UV-Vis spectrophotometry.

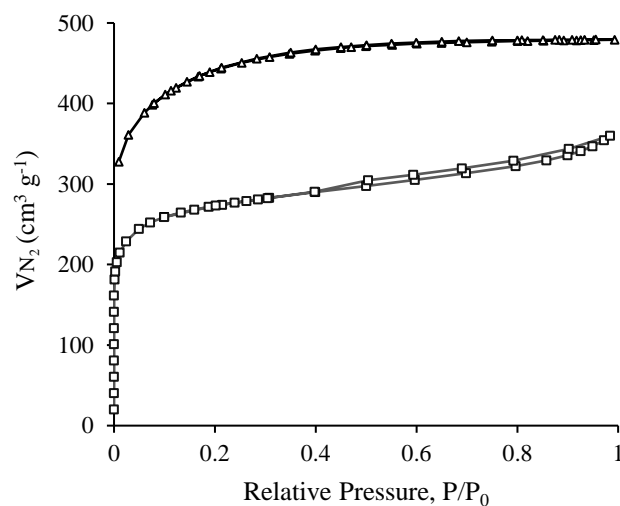

Figure S3. N<sub>2</sub> adsorption-desorption isotherms of ACK and CC carbon samples.

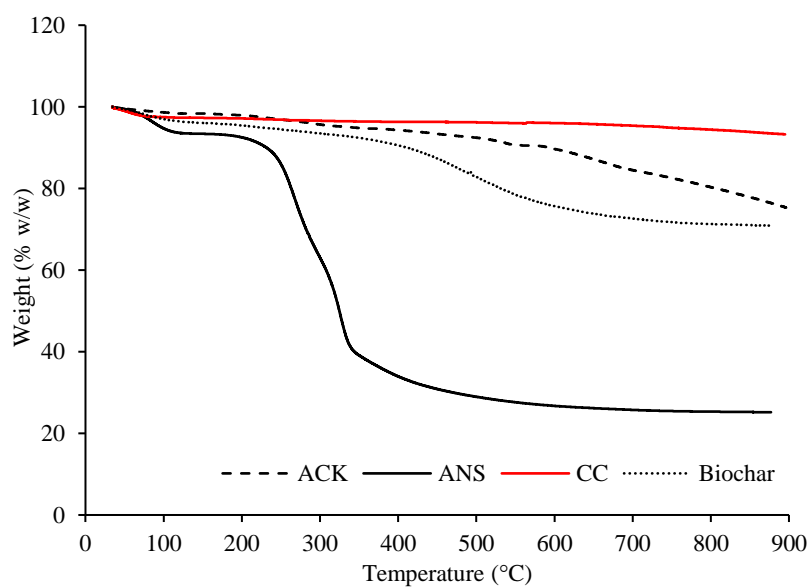

Figure S4. TGA curves of ANS biomass, biochar, ACK, and CC under argon atmosphere.

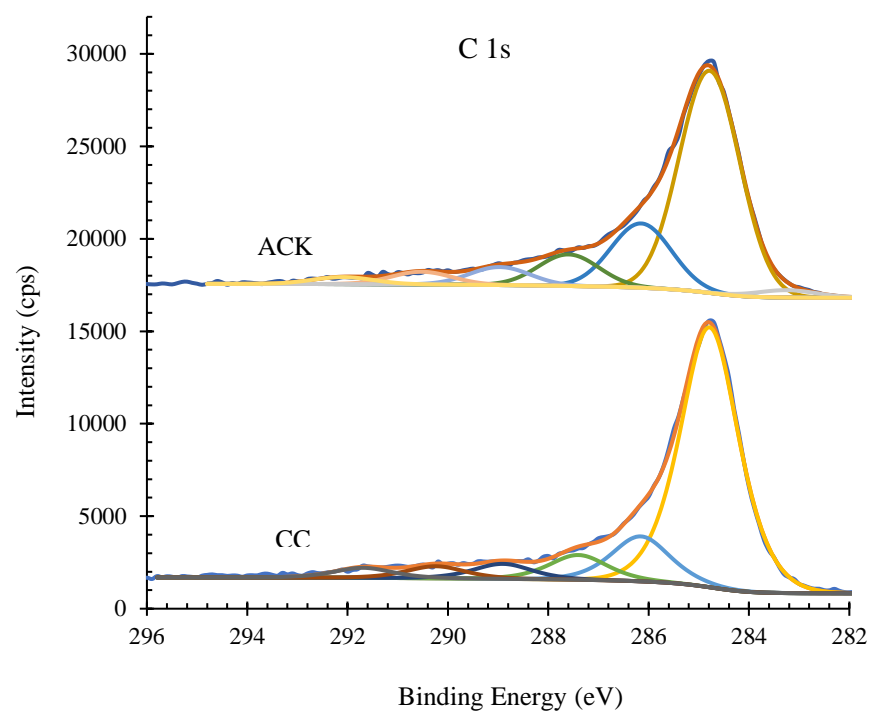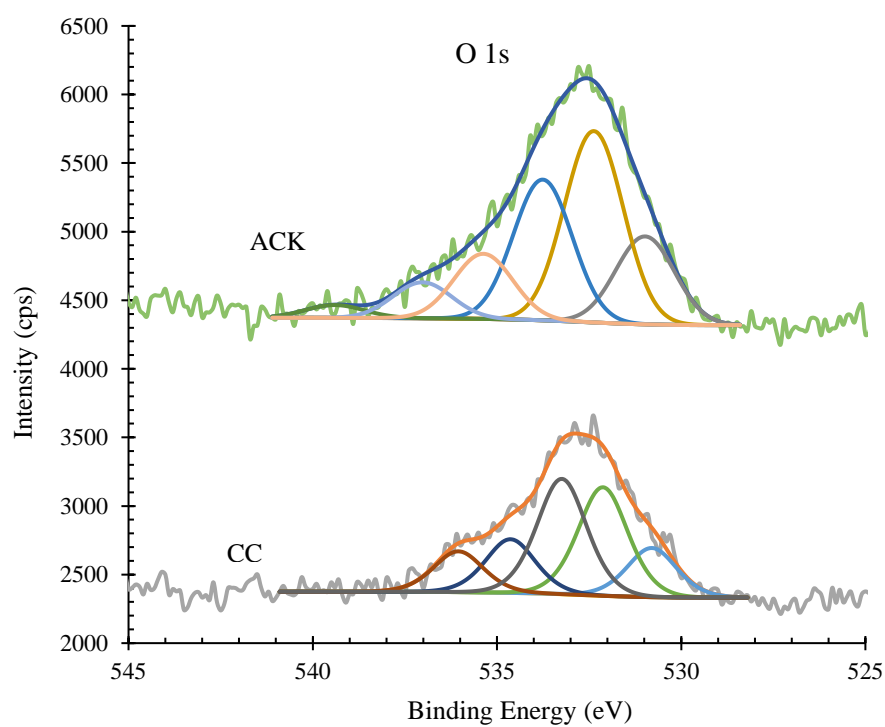

Figure S5. XPS peak fitted profiles of C 1s and O 1s regions of ACK and CC carbons.

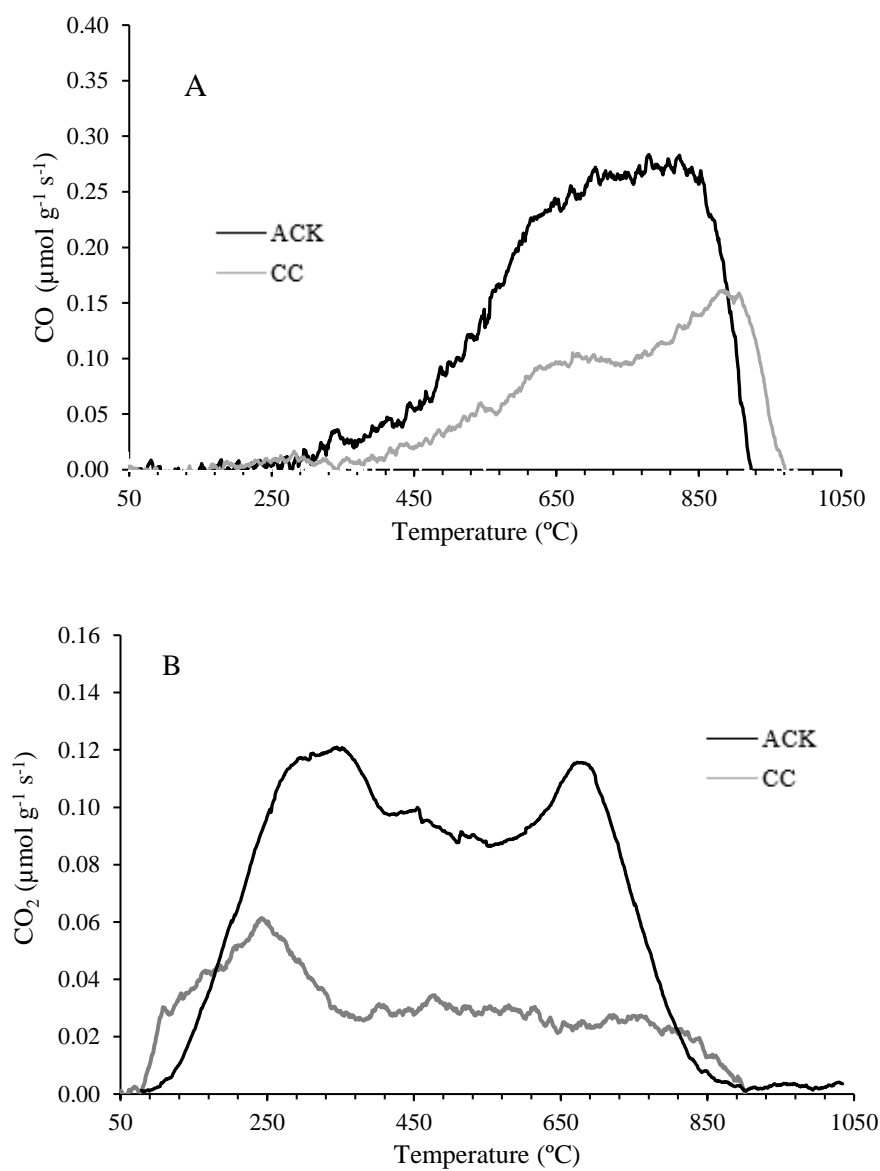

Figure S6. TPD spectra of the carbons: A) CO and B) CO<sub>2</sub> evolution.

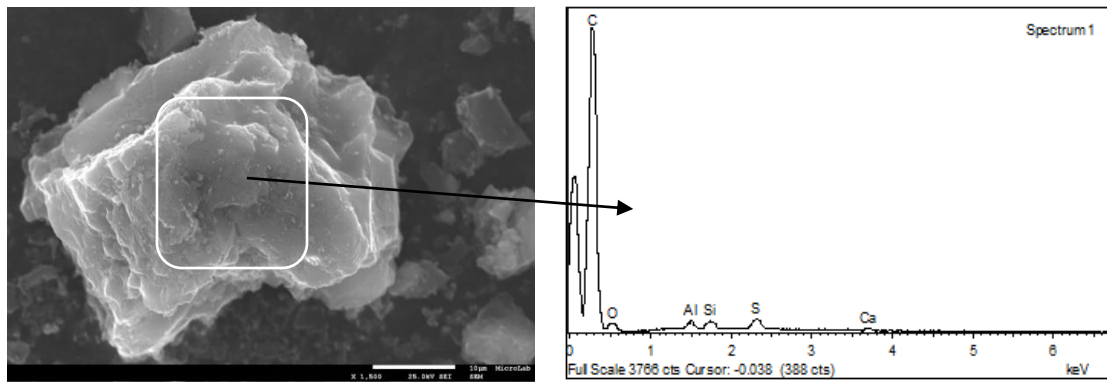

Figure S7. SEM image of CC sample with magnification 1500× and the corresponding EDS spectrum [29].

Table S1. Equations of the kinetic models and isotherm models used in the present work.

| <i>Kinetic models</i>              | <b>Equation</b>                                                                                                                                                                  |
|------------------------------------|----------------------------------------------------------------------------------------------------------------------------------------------------------------------------------|
| Pseudo 1 <sup>st</sup> order (PFO) | $q_t = q_e \times (1 - e^{-k_1 \times t})$ $k_1 \text{ (min}^{-1}\text{), pseudo-1}^{\text{st}} \text{ order rate constant}$                                                     |
| Pseudo 2 <sup>nd</sup> order (PSO) | $q_t = \frac{q_e^2 \times k_2 \times t}{1 + (k_2 \times q_e \times t)}$ $k_2 \text{ (g mg}^{-1} \text{ min}^{-1}\text{), pseudo-2}^{\text{nd}} \text{ order rate constant}$      |
| <i>Adsorption isotherms models</i> | <b>Equation</b>                                                                                                                                                                  |
| Langmuir                           | $q_e = \frac{q_m \times K_L \times C_e}{1 + K_L \times C_e}$ $q_m \text{ (mg g}^{-1}\text{), monolayer adsorption capacity; } K_L \text{ (L mg}^{-1}\text{), Langmuir constant}$ |

---

|            |                                                                                                                                                                                                                                                                                    |
|------------|------------------------------------------------------------------------------------------------------------------------------------------------------------------------------------------------------------------------------------------------------------------------------------|
| Freundlich | $q_e = K_F C_e^{1/n}$ <p> <math>K_F</math> (mg g<sup>-1</sup>)/(mg L<sup>-1</sup>)<sup>n</sup>, Freundlich isotherm constant; <math>n</math> (dimensionless), adsorption intensity </p>                                                                                            |
| Sips       | $q_e = \frac{q_{ms} K_s (C_e)^{n_s}}{1 + K_s (C_e)^{n_s}}$ <p> <math>q_{ms}</math> (mg g<sup>-1</sup>), maximum adsorption capacity; <math>K_s</math> (L mg<sup>-1</sup>), Sips equilibrium constant; <math>n_s</math> (dimensionless), heterogeneity of the binding surface. </p> |

---

$q_e$  - amount of adsorbate uptake per mass of adsorbent at equilibrium;  $q_t$  - amount of adsorbate uptake per mass of adsorbent at time  $t$ ;  $C_e$  - amount of solute in the aqueous phase at equilibrium (mg L<sup>-1</sup>)
